# Supplementary material for: Graphene nanoparticles-decorated silicon nanowires with tungsten oxide counter electrode for quasi-solid state hybrid solar cells
Source: Royal Society of Chemistry journal article supplement (doi:10.1039/d0se01605e), 2021-01-01
Supplement: d0se01605e1.pdf [file d0se01605e1.pdf]

Electronic Supplementary Information

**Graphene Nanoparticles Decorated Silicon Nanowires with Tungsten Oxide Counter  
Electrode for Quasi Solid-State Hybrid Solar Cells**

Ankita Kolay,<sup>a</sup> Manoranjan Ojha,<sup>a</sup> Melepurath Deepa<sup>\*,a</sup>

<sup>a</sup>Department of Chemistry, Indian Institute of Technology Hyderabad, Kandi, Sangareddy,  
Telangana 502285, India.

E-mail: mdeepa@chy.iith.ac.in

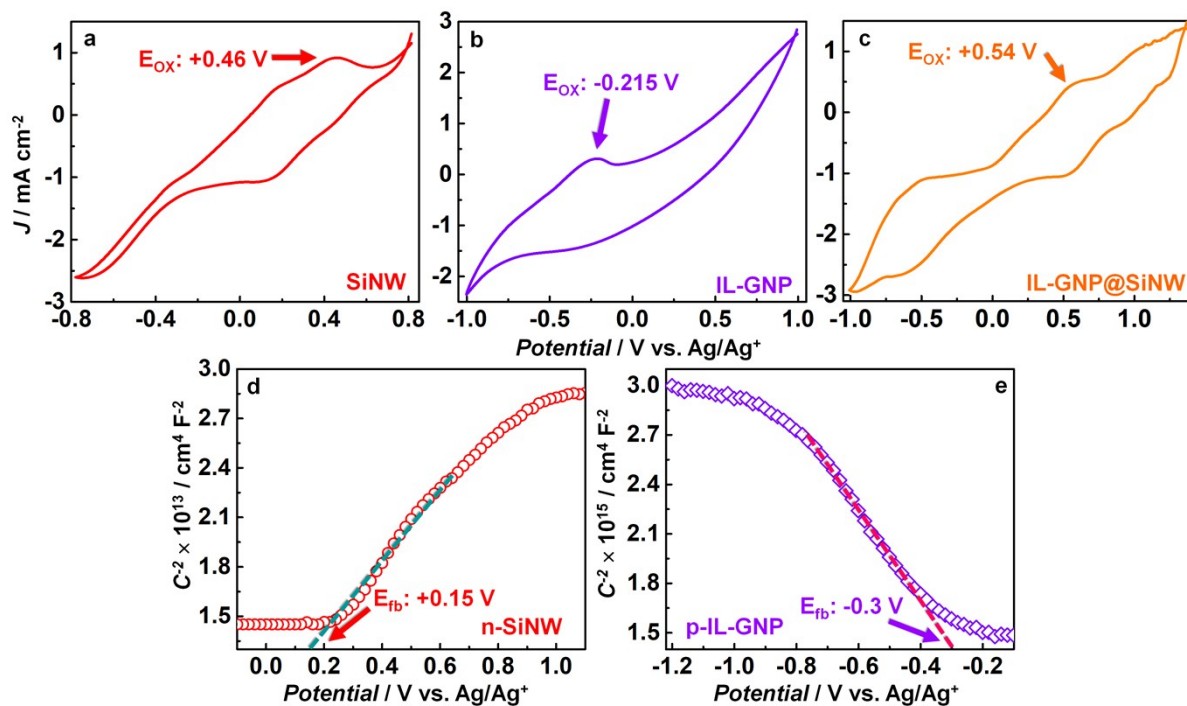

Figure S1 CV plots of (a) SiNW, (b) IL-GNP and (c) IL-GNP@SiNW in three electrode cells, with 0.1 M KCl as the electrolyte, a Pt rod as the counter electrode and Ag/AgCl/KCL as the reference. Mott-Schottky plots of (d) SiNW and (e) IL-GNP in the same cell configuration in dark. The intercepts are the flat band potentials in (d) and (e).

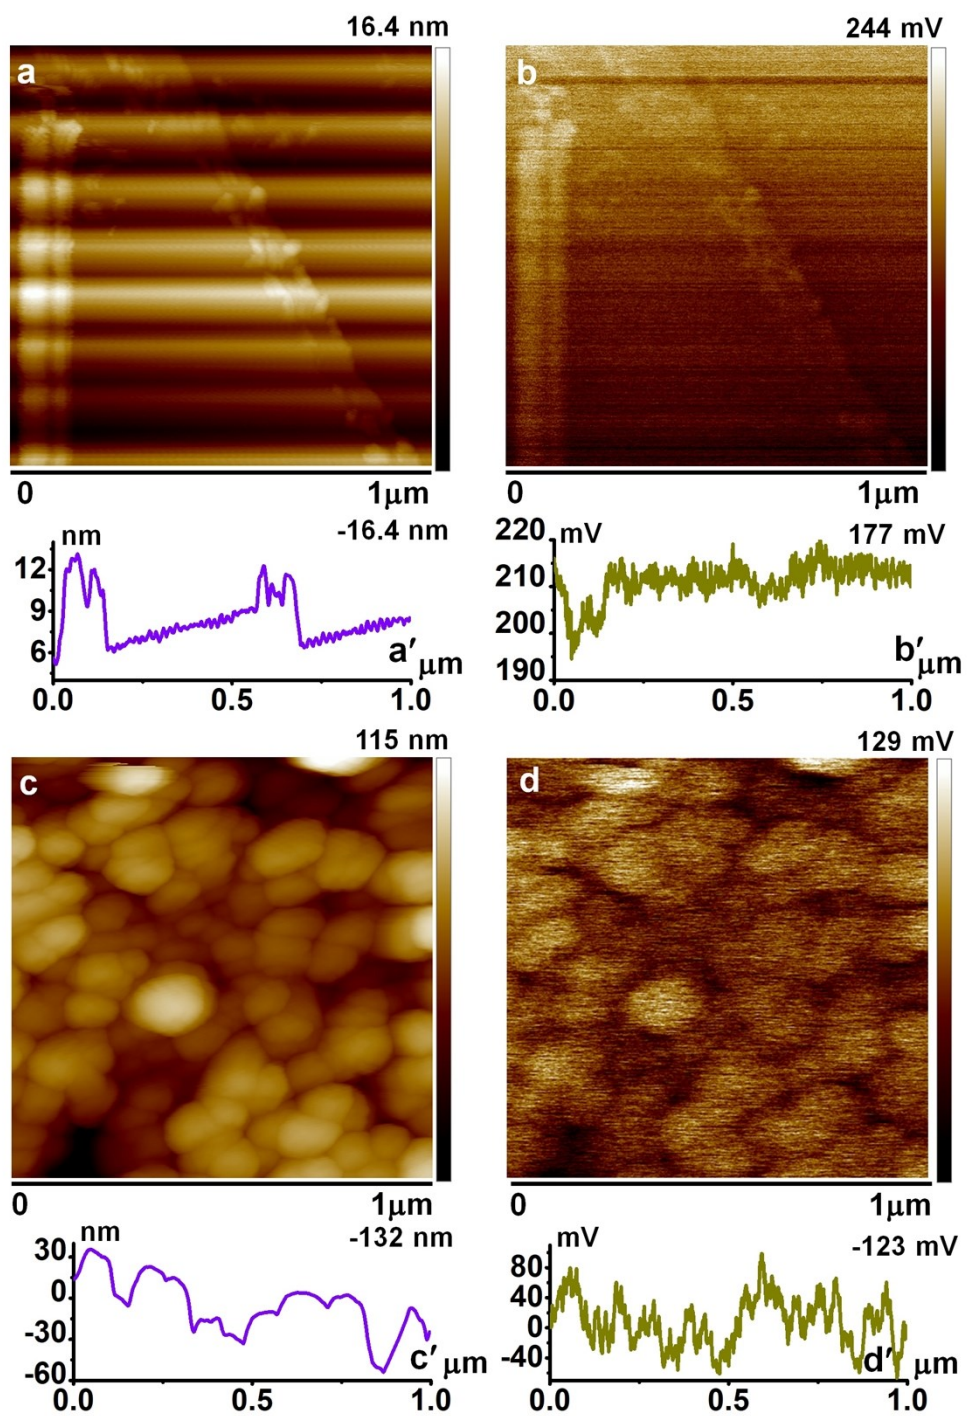

Figure S2 Topography (a,c) and surface potential maps (b,d) of HOPG and  $\text{WO}_3$ , and the corresponding representative section profiles are shown in (a',c') and (b',d') respectively.

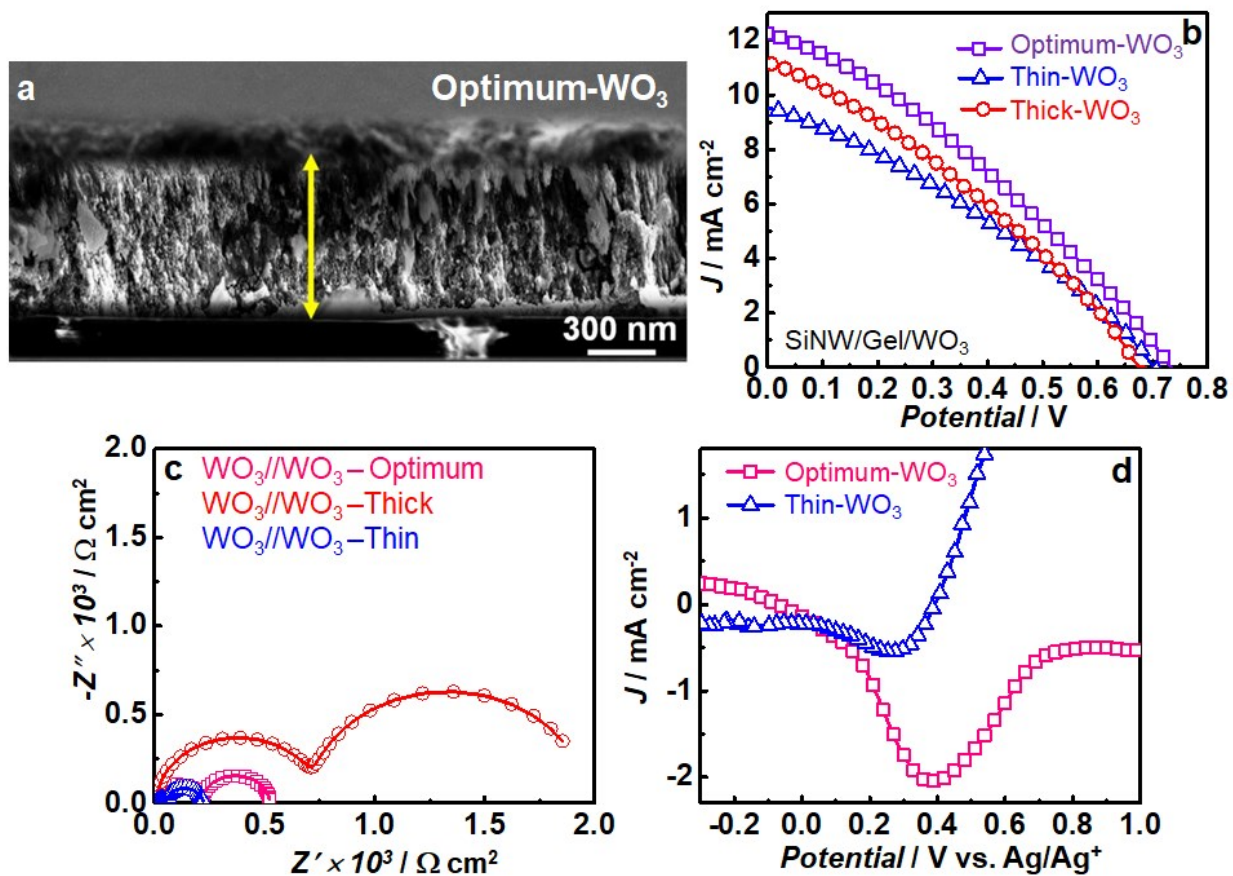

Figure S3 (a) Cross-sectional SEM image of a WO<sub>3</sub>@FTO film. (b) J-V characteristics of SiNW/gel/WO<sub>3</sub> cells, with varying WO<sub>3</sub> thicknesses, based on electrodeposition span. (c) Nyquist plots compared for symmetric cells of WO<sub>3</sub> (of different thicknesses) with BMIM<sup>+</sup>I<sub>2</sub> gel over 10 mHz to 1 MHz. (d) I-V plots comparing the tri-iodide reduction capability of WO<sub>3</sub> films of different thicknesses, with Pt as the counter electrode.

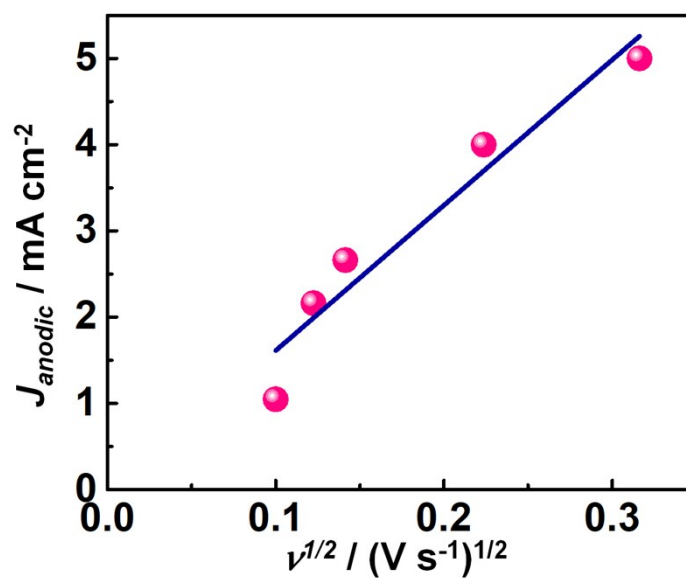

Figure S4 Linear dependence of anodic peak current density versus square root of scan rate for a  $\text{WO}_3$  film.

Table S1 Fitted parameters for Nyquist plots for symmetric cells based on the gel electrolyte composed of 1 M BMIM<sup>+</sup>I<sup>-</sup>, 0.05 M I<sub>2</sub>, 2 wt% poly(AMPS) and 7 wt% SiO<sub>2</sub> in PC.

| Cell                                     | $R_1$<br>( $R_{\text{gel}}, \Omega$<br>$\text{cm}^2$ ) | $R_2$<br>( $R_{\text{electron}}, \Omega$<br>$\text{cm}^2$ ) | $R_3$<br>( $R_{\text{ct}}, \Omega \text{ cm}^2$ ) | $C_2$<br>( $C_{\mu}, \text{F cm}^2$ ) | $C_3$<br>( $C_{\text{dl}}, \text{F cm}^2$ ) |
|------------------------------------------|--------------------------------------------------------|-------------------------------------------------------------|---------------------------------------------------|---------------------------------------|---------------------------------------------|
| FTO/ $\text{WO}_3$ // $\text{WO}_3$ /FTO | 6.3                                                    | 206.2                                                       | 312.5                                             | $1.2 \times 10^{-5}$                  | $3.4 \times 10^{-3}$                        |
| FTO//FTO                                 | 10.6                                                   | 33.2                                                        | 4286                                              | $3.6 \times 10^{-5}$                  | $2 \times 10^{-3}$                          |

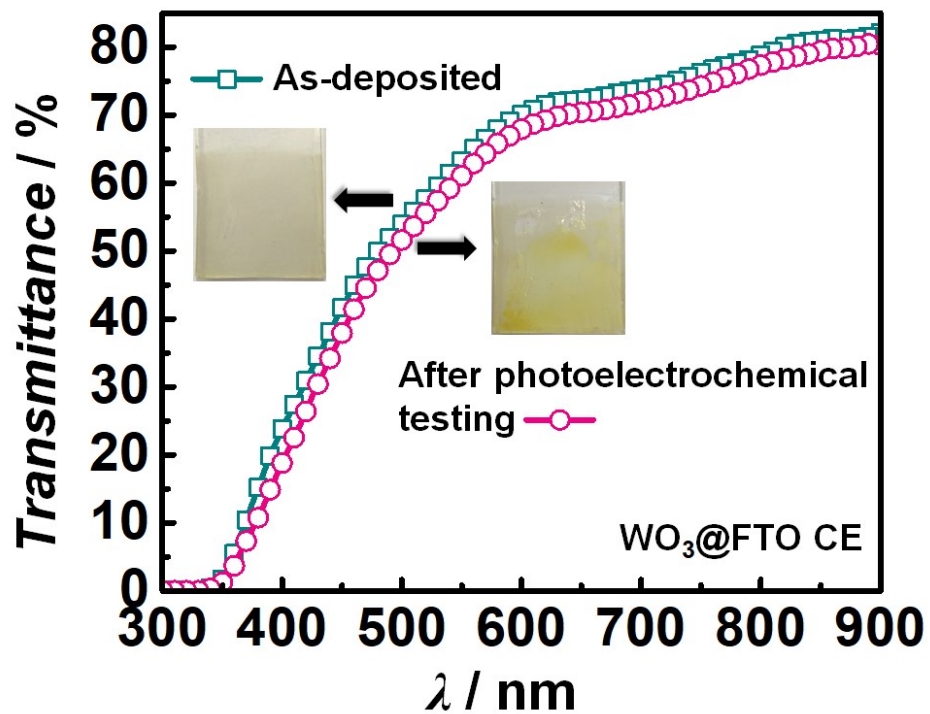

Figure S5 Transmittance spectra of a  $\text{WO}_3$  CE film before and after the solar cell stability test.

Table S2 Solar cell parameters for different cells, standard deviation on 5-cell data.

| Cells                              | V <sub>OC</sub> (mV) | J <sub>SC</sub> (mA cm <sup>-2</sup> ) | FF          | PCE (%)   |
|------------------------------------|----------------------|----------------------------------------|-------------|-----------|
| SiNW/Gel/WO <sub>3</sub>           |                      |                                        |             |           |
| Cell 1                             | 754                  | 13.62                                  | 0.461       | 4.73      |
| Cell 2                             | 644                  | 12.19                                  | 0.427       | 3.35      |
| Cell 3                             | 674                  | 12.37                                  | 0.436       | 3.64      |
| Cell 4                             | 704                  | 12.91                                  | 0.445       | 4.05      |
| Cell 5                             | 724                  | 13.19                                  | 0.451       | 4.31      |
| Average                            | 700±43               | 12.86±0.59                             | 0.444±0.013 | 4.02±0.54 |
| SiNW/Liquid/WO <sub>3</sub>        |                      |                                        |             |           |
| Cell 1                             | 731                  | 12.22                                  | 0.316       | 2.83      |
| Cell 2                             | 631                  | 10.60                                  | 0.296       | 1.98      |
| Cell 3                             | 661                  | 11.02                                  | 0.301       | 2.19      |
| Cell 4                             | 691                  | 11.42                                  | 0.308       | 2.43      |
| Cell 5                             | 701                  | 11.70                                  | 0.310       | 2.54      |
| Average                            | 683±38               | 11.39±0.62                             | 0.306±0.008 | 2.39±0.33 |
| IL-GNP@SiNW/Gel/WO <sub>3</sub>    |                      |                                        |             |           |
| Cell 1                             | 768                  | 18.39                                  | 0.562       | 7.93      |
| Cell 2                             | 753                  | 17.32                                  | 0.558       | 7.28      |
| Cell 3                             | 740                  | 17.92                                  | 0.557       | 7.38      |
| Cell 4                             | 738                  | 17.25                                  | 0.556       | 7.08      |
| Cell 5                             | 718                  | 16.75                                  | 0.551       | 6.63      |
| Average                            | 743±19               | 17.53±0.64                             | 0.557±0.004 | 7.26±0.47 |
| IL-GNP@SiNW/Liquid/WO <sub>3</sub> |                      |                                        |             |           |
| Cell 1                             | 761                  | 17.23                                  | 0.487       | 6.39      |
| Cell 2                             | 683                  | 15.83                                  | 0.462       | 5.00      |
| Cell 3                             | 673                  | 15.39                                  | 0.459       | 4.76      |
| Cell 4                             | 733                  | 16.36                                  | 0.477       | 5.72      |
| Cell 5                             | 703                  | 16.16                                  | 0.468       | 5.32      |
| Average                            | 711±36               | 16.19±0.69                             | 0.471±0.011 | 5.44±0.64 |

Table S3 Comparison of n-SiNW based solar cells from photovoltaic literature.

| Solar Cell Architecture                                                                                                | $J_{sc}$<br>(mA cm <sup>-2</sup> ) | $V_{oc}$<br>(mV) | FF                  | PCE or $\eta$<br>(%) | Reference    |
|------------------------------------------------------------------------------------------------------------------------|------------------------------------|------------------|---------------------|----------------------|--------------|
| Al/p-Si-n-SiNW/TCO/polymer<br>(0.6 cm <sup>2</sup> )                                                                   | 2                                  | 230-280          | 0.2                 | 0.1                  | 1            |
| Glass/mc-p-Si/mc-n-SiNW/mc-<br>n <sup>+</sup> -SiNW/Au (0.64 mm <sup>2</sup> )                                         | 40                                 | 450              | -                   | 4.4                  | 2            |
| PIN-RJSiNW                                                                                                             | 14.6                               | 750              | 0.581               | 6.32                 | 3            |
| n-SiNW/p-SiNW/Al/Pd<br>(8 $\mu$ m absorber)                                                                            | 16.82 $\pm$<br>0.50                | 525 $\pm$ 2      | 0.559<br>$\pm$ 0.02 | 5.30 $\pm$ 0.19      | 4            |
| p-i-n -coaxial SiNW (upper<br>bound)                                                                                   | 23.9 $\pm$<br>1.2                  | 260              | 0.55                | 3.4 $\pm$ 0.2        | 5            |
| p-i-n -coaxial SiNW (lower<br>bound)                                                                                   | 16 $\pm$ 0.8                       | 260              | 0.55                | 2.3 $\pm$ 0.2        | 5            |
| ITO/V <sub>2</sub> O <sub>5</sub> /n-SiNW/TiO <sub>2</sub> /Al                                                         | 35.7                               | 490              | 0.727               | 12.7                 | 6            |
| ITO/n-SiNW/TiO <sub>2</sub> /Al                                                                                        | 20.4                               | 214              | 0.425               | 1.86                 | 6            |
| AZO core-shell TCO/a-Si/n-<br>SiNW (7 mm <sup>2</sup> )                                                                | 27                                 | 476              | 0.562               | 7.29                 | 7            |
| Al/n-SiNW/PEDOT/ITO                                                                                                    | 19.28                              | 470              | 0.61                | 5.09                 | 8            |
| Al/n-SiNW/Spiro-<br>OMeTAD/PEDOT:PSS/Ag                                                                                | 26.7                               | 530              | 0.643               | 9.2                  | 9            |
| Al/n-SiNW-<br>DADS/PEDOT:PSS/Ag                                                                                        | 28.80 $\pm$<br>1.03                | 488 $\pm$ 6      | 0.49 $\pm$<br>0.012 | 7.02 $\pm$ 0.17      | 10           |
| n-SiNW/40%HBr, 3%Br <sub>2</sub> /Pt<br>mesh                                                                           | 0.872                              | 730 $\pm$ 20     | 0.45                | 0.286                | 11           |
| PtNPs/C@n-SiNW/8.6M HBr,<br>0.05Br <sub>2</sub> /Pt mesh                                                               | 36.89                              | 530              | 0.555               | 10.86                | 12           |
| n-SiNW-CH <sub>3</sub> (Pt)/0.05 M I <sub>2</sub> , 0.1<br>M LiI in a mixed IL<br>(EMISCN:PMII, 7:13, v/v)/Pt -<br>ITO | 33.7                               | 322              | 0.40                | 4.3                  | 13           |
| n-SiNW-PtNPs/8.6M HBr,<br>0.05Br <sub>2</sub> /Pt                                                                      | 24.26                              | 550              | 0.61                | 8.14                 | 14           |
| n-SiNW-AuNPs/8.6M HBr,<br>0.05Br <sub>2</sub> /Pt                                                                      | 14                                 | 745.3            | 0.23                | 2.4                  | 14           |
| Se NPs@Si NWs/8.6M HBr,<br>0.05Br <sub>2</sub> /C-fabric                                                               | 17.12                              | 790              | 0.52                | 7.03                 | 15           |
| C@TeNRs@Si NWs/8.6M<br>HBr, 0.05Br <sub>2</sub> /C-fabric                                                              | 23.27                              | 893              | 0.56                | 11.59                | 16           |
| IL-GNP@SiNW/I <sub>2</sub> ,I <sup>-</sup> gel/WO <sub>3</sub>                                                         | 18.39                              | 768              | 0.56                | 7.93                 | This<br>work |

TCO: Transparent conducting coating, mc: Multicrystalline, RJ: Radial junction, AZO: Al doped ZnO, a: Amorphous, Spiro-OMeTAD: 2,2',7,7'-Tetrakis-(N,N-di-4-methoxyphenylamino)-9,9'-spirobifluorene, ITO: In<sub>2</sub>O<sub>3</sub>:Sn coated glass, PEDOT: Poly(3,4-ethylenedioxythiophene), PSS: Poly(4-styrenesulfonate), DADS: Diallyl disulfide, IL: Ionic liquid, PMII: 1-Propyl-3-



methylimidazolium iodide, EMISCN: 1-Ethyl-3-methylimidazolium thiocyanate, NPs: Nanoparticles, IL-GNP: Ionic liquid functionalized graphene nanoparticles.

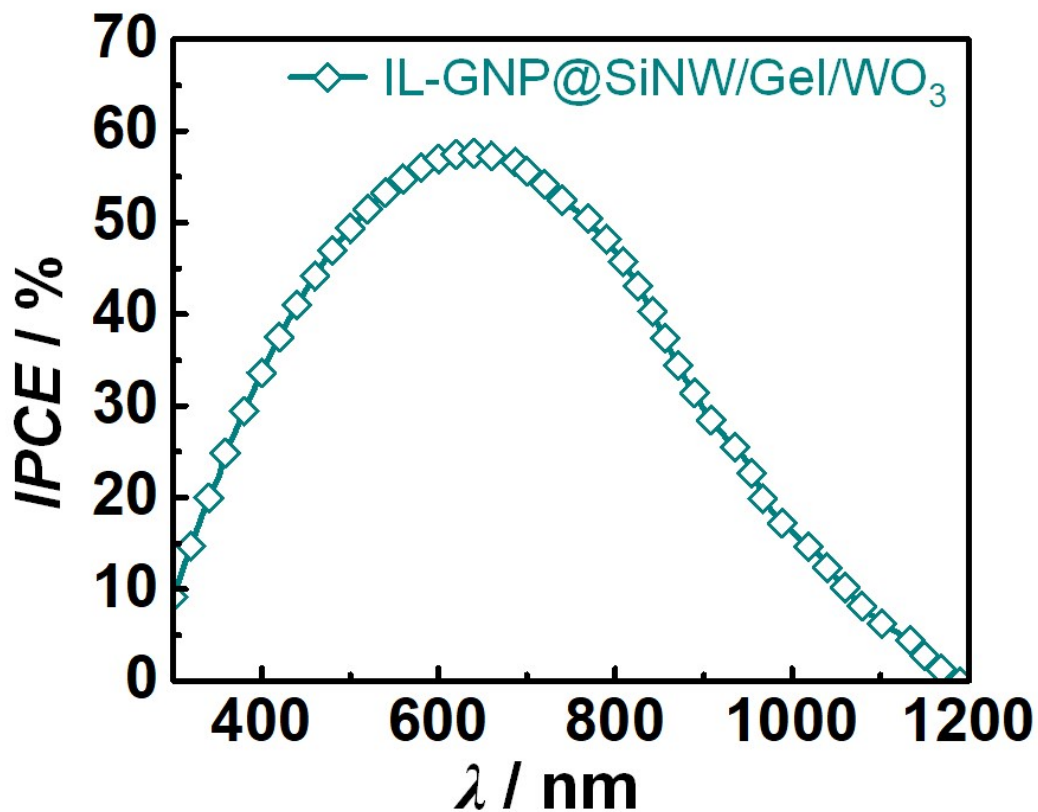

Figure S6 IPCE plot for the IL-GNP@SiNW/Gel/WO<sub>3</sub> hybrid solar cell.

## References

1. T. Stelzner, M. Pietsch, G. Andra, F. Falk, E. Ose and S. Christiansen, *Nanotechnology*, 2008, **19**, 295203.
2. V. Sivakov, G. Andra, A. Gawlik, A. Berger, J. Plentz, F. Falk and S. H. Christiansen, *Nano Lett.*, 2009, **9**, 1549–1554.
3. M. Al-Ghzaiwat, M. Foldyna, T. Fuyuki, W. Chen, E. V. Johnson, J. Meot and P. Roca i Cabarrocas, *Sci Rep*, 2018, **8**, 1651
4. E. Garnett and P. Yang, *Nano Lett.*, 2010, **10**, 1082–1087

5. B. Tian, X. Zheng, T. J. Kempa, Y. Fang, N. Yu, G. Yu, J. Huang and C. M. Lieber, *Nature*, 2007, **449**, 885–890.
6. G. Ma, R. Du, Y. n. Cai, C. Shen, X. Gao, Y. Zhang, F. Liu, W. Shi, W. Du and Y. Zhang, *Sol Energy Mater Sol Cells*, 2019, **193**, 163–168.
7. G. Jia, M. Steglich, I. Sill and F. Falk, *Sol. Energy Mater. Sol. Cells*, 2012, **96**, 226–230.
8. S. C. Shiu, J. J. Chao, S. C. Hung, C. L. Yeh and C. F. Lin, *Chem. Mater.*, 2010, **22**, 3108–3113.
9. L. He, C. Jiang, H. Wang, D. Lai and Rusli, *ACS Appl. Mater. Interfaces*, 2012, **4**, 1704–1708.
10. Y. Rui, T. Zhang, D. Zhu, Y. Feng, A. N. Cartwright, M. T. Swihart, Y. Yang, T. Zhang, C. Huang, H. Wang and D. Gu, *J. Phys. Chem. C*, 2019, **123**, 4664–4673.
11. K. Peng, X. Wang and S. T. Lee, *Appl. Phys. Lett.*, 2008, **92**, 163103.
12. X. Wang, K. Q. Peng, X. J. Pan, X. Chen, Y. Yang, L. Li, X. M. Meng, W. J. Zhang and S. T. Lee, *Angew. Chem. Int. Ed.*, 2011, **50**, 9861–9865.
13. X. Shen, B. Sun, F. Yan, J. Zhao, F. Zhang, S. Wang, X. Zhu and S. Lee, *ACS Nano*, 2010, **4**, 5869–5876.
14. K. Q. Peng, X. Wang, X. L. Wu and S. T. Lee, *Nano Lett.*, 2009, **9**, 3704–3709.
15. A. Kolay, D. Maity, P. Ghosal and M. Deepa, *J. Phys. Chem. C*, 2019, **14**, 8614–8622.
16. A. Kolay, D. Maity, P. Ghosal and M. Deepa, *ACS Appl. Mater. Interfaces* 2019, **11**, 47972–47983.
